# Supplementary material for: Mesoscale eddies drive complex, large-scale three-dimensional biochemical variability in the mixed layer of a large lake (Lake Geneva)
Source: Research Square preprint supplement (doi:10.21203/rs.3.rs-8156830/v1), 2025-12-02
Supplement: Supplementary file 1 [file 20f426f3eacc40279b64c720.docx]

Supporting Information

for

**Mesoscale eddies drive complex, large-scale three-dimensional biochemical variability in the mixed layer of a large lake (Lake Geneva)**

Seyed Mahmood Hamze-Ziabari1,2*, Ulrich Lemmin1, David Andrew Barry1

1Ecological Engineering Laboratory (ECOL), Institute of Environmental Engineering (IIE), Faculty of Architecture, Civil and Environmental Engineering (ENAC), Ecole Polytechnique Fédérale de Lausanne (EPFL), 1015 Lausanne, Switzerland

2Laboratory of Cryospheric Sciences (CRYOS), Institute of Environmental Engineering (IIE), Faculty of Architecture, Civil and Environmental Engineering (ENAC), Ecole Polytechnique Fédérale de Lausanne (EPFL), 1015 Lausanne, Switzerland

*Corresponding author: Seyed Mahmood Hamze-Ziabari ([mahmood.ziabari@epfl.ch](mailto:mahmood.ziabari@epfl.ch))

**Contents**

Fig. S1. Measured profiles at the LéXPLORE platform

Fig. S2. Field observation of a complex gyre system under weakly stratified conditions in Lake Geneva.

Fig. S3. Temporal evolution of a Submeoscale Cyclonic Eddy (SCE) and a Cyclonic Gyre (CG) in Lake Geneva.

Fig. S4. Comparisons between temperature profiles measured at CIPEL station SHL2 and at LéXPLORE platform.

Fig. S5. Measured profiles of Dissolved Oxygen (DO) and total phosphorus for 2021 at station SHL2 provided by CIPEL.


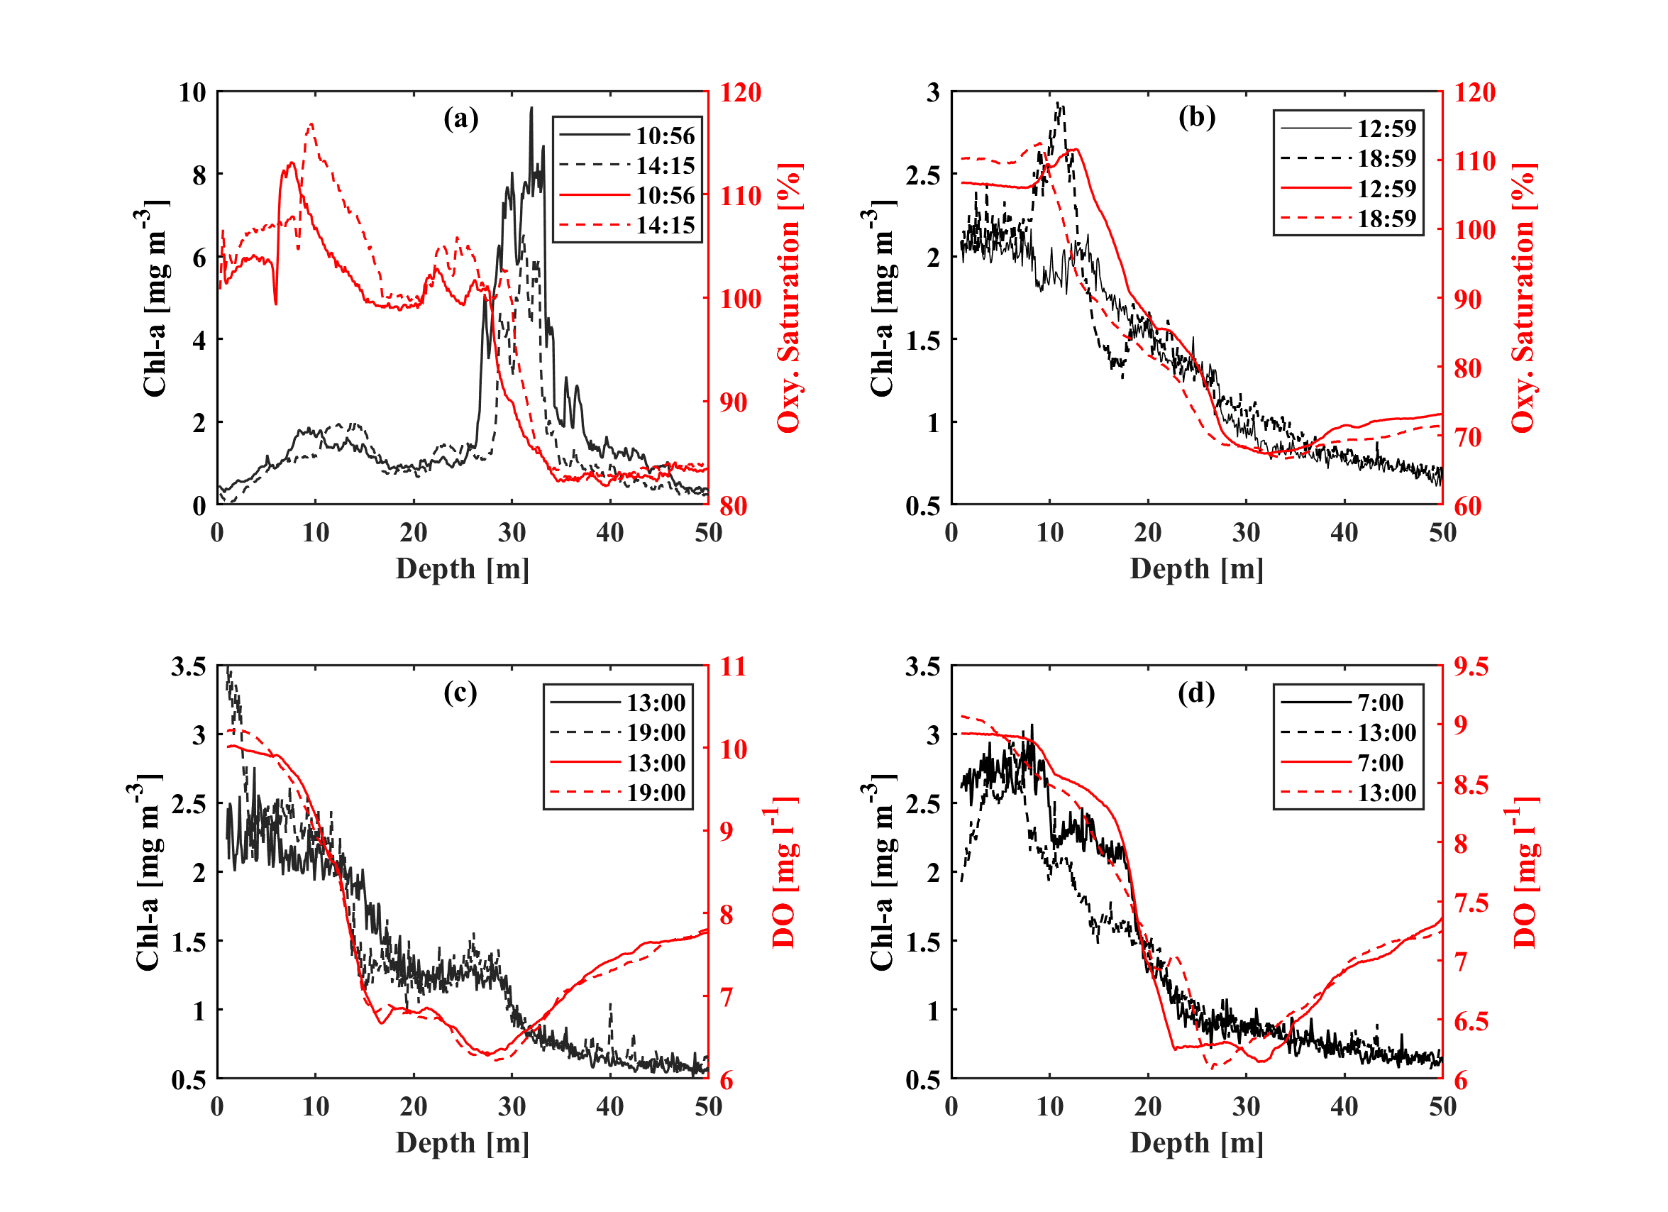


**Fig. S1.** Profiles of chlorophyll-a concentration (Chl-a) and oxygen saturation at the LéXPLORE platform on (a) 22 July 2022, and (b) 23 August 2022, taken at the same time as the transect measurements. Profiles of Chl-a and dissolved oxygen (DO) at the LéXPLORE platform on (c) 19 October 2021, and (d) 26 October 2021, taken at the same time as the transect measurements.


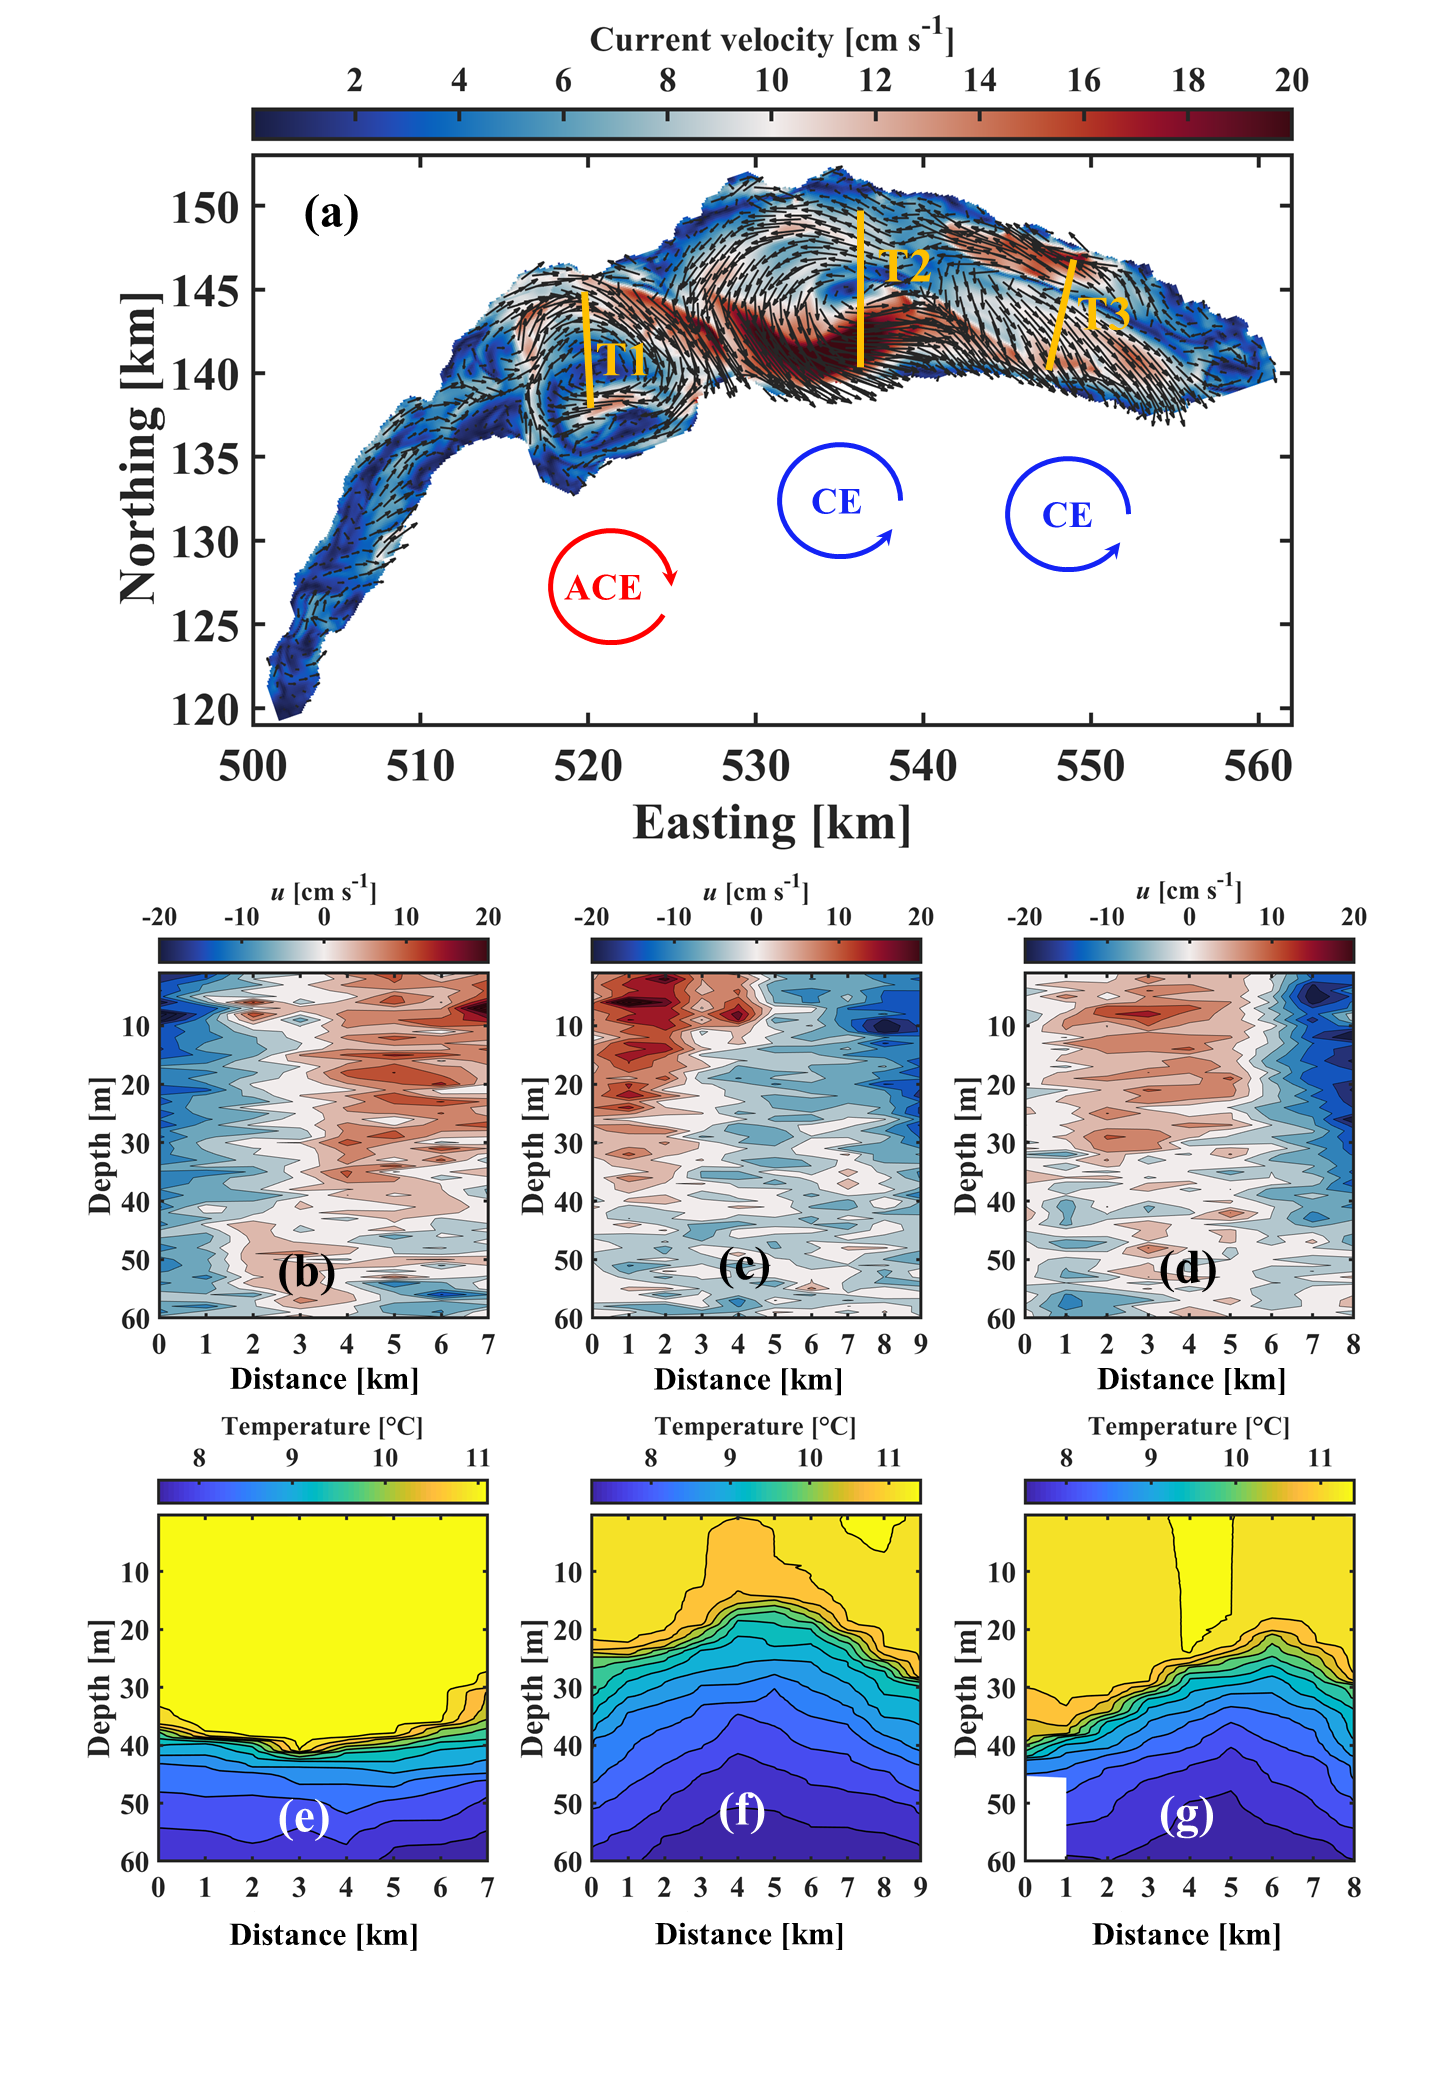


**Fig. S2.** Field observations of a complex three-eddy system under weakly stratified conditions in Lake Geneva in November 2019. Compare to October 2021 above and Fig. S3 and 4 in the main text. (a) Numerical simulation of horizontal velocity on 25 November 2019 (near-surface, 0.3 m). The yellow lines represent the transects (T) where velocity and temperature profiles were measured. Measured velocity profile along transects from south (left edge of panel) to north (right edge of panel) for: (b) T1, (c) T2 and (d) T3. The blue shades indicate southward currents and the red, northward currents. Measured temperature profiles along transects: (e) T1, (f) T2 and (g) T3. ACE: Anticyclonic Eddy (counterclockwise rotating), CE: Cyclonic Eddy (clockwise rotating). A bowl-shaped thermocline is seen in ACE and a dome-shaped thermocline in the CEs. Note that pelagic upwelling in the CGs reaches to the surface in (f). Colorbars indicate the range of the parameters. Black arrows in (a) give the orientation of the currents.


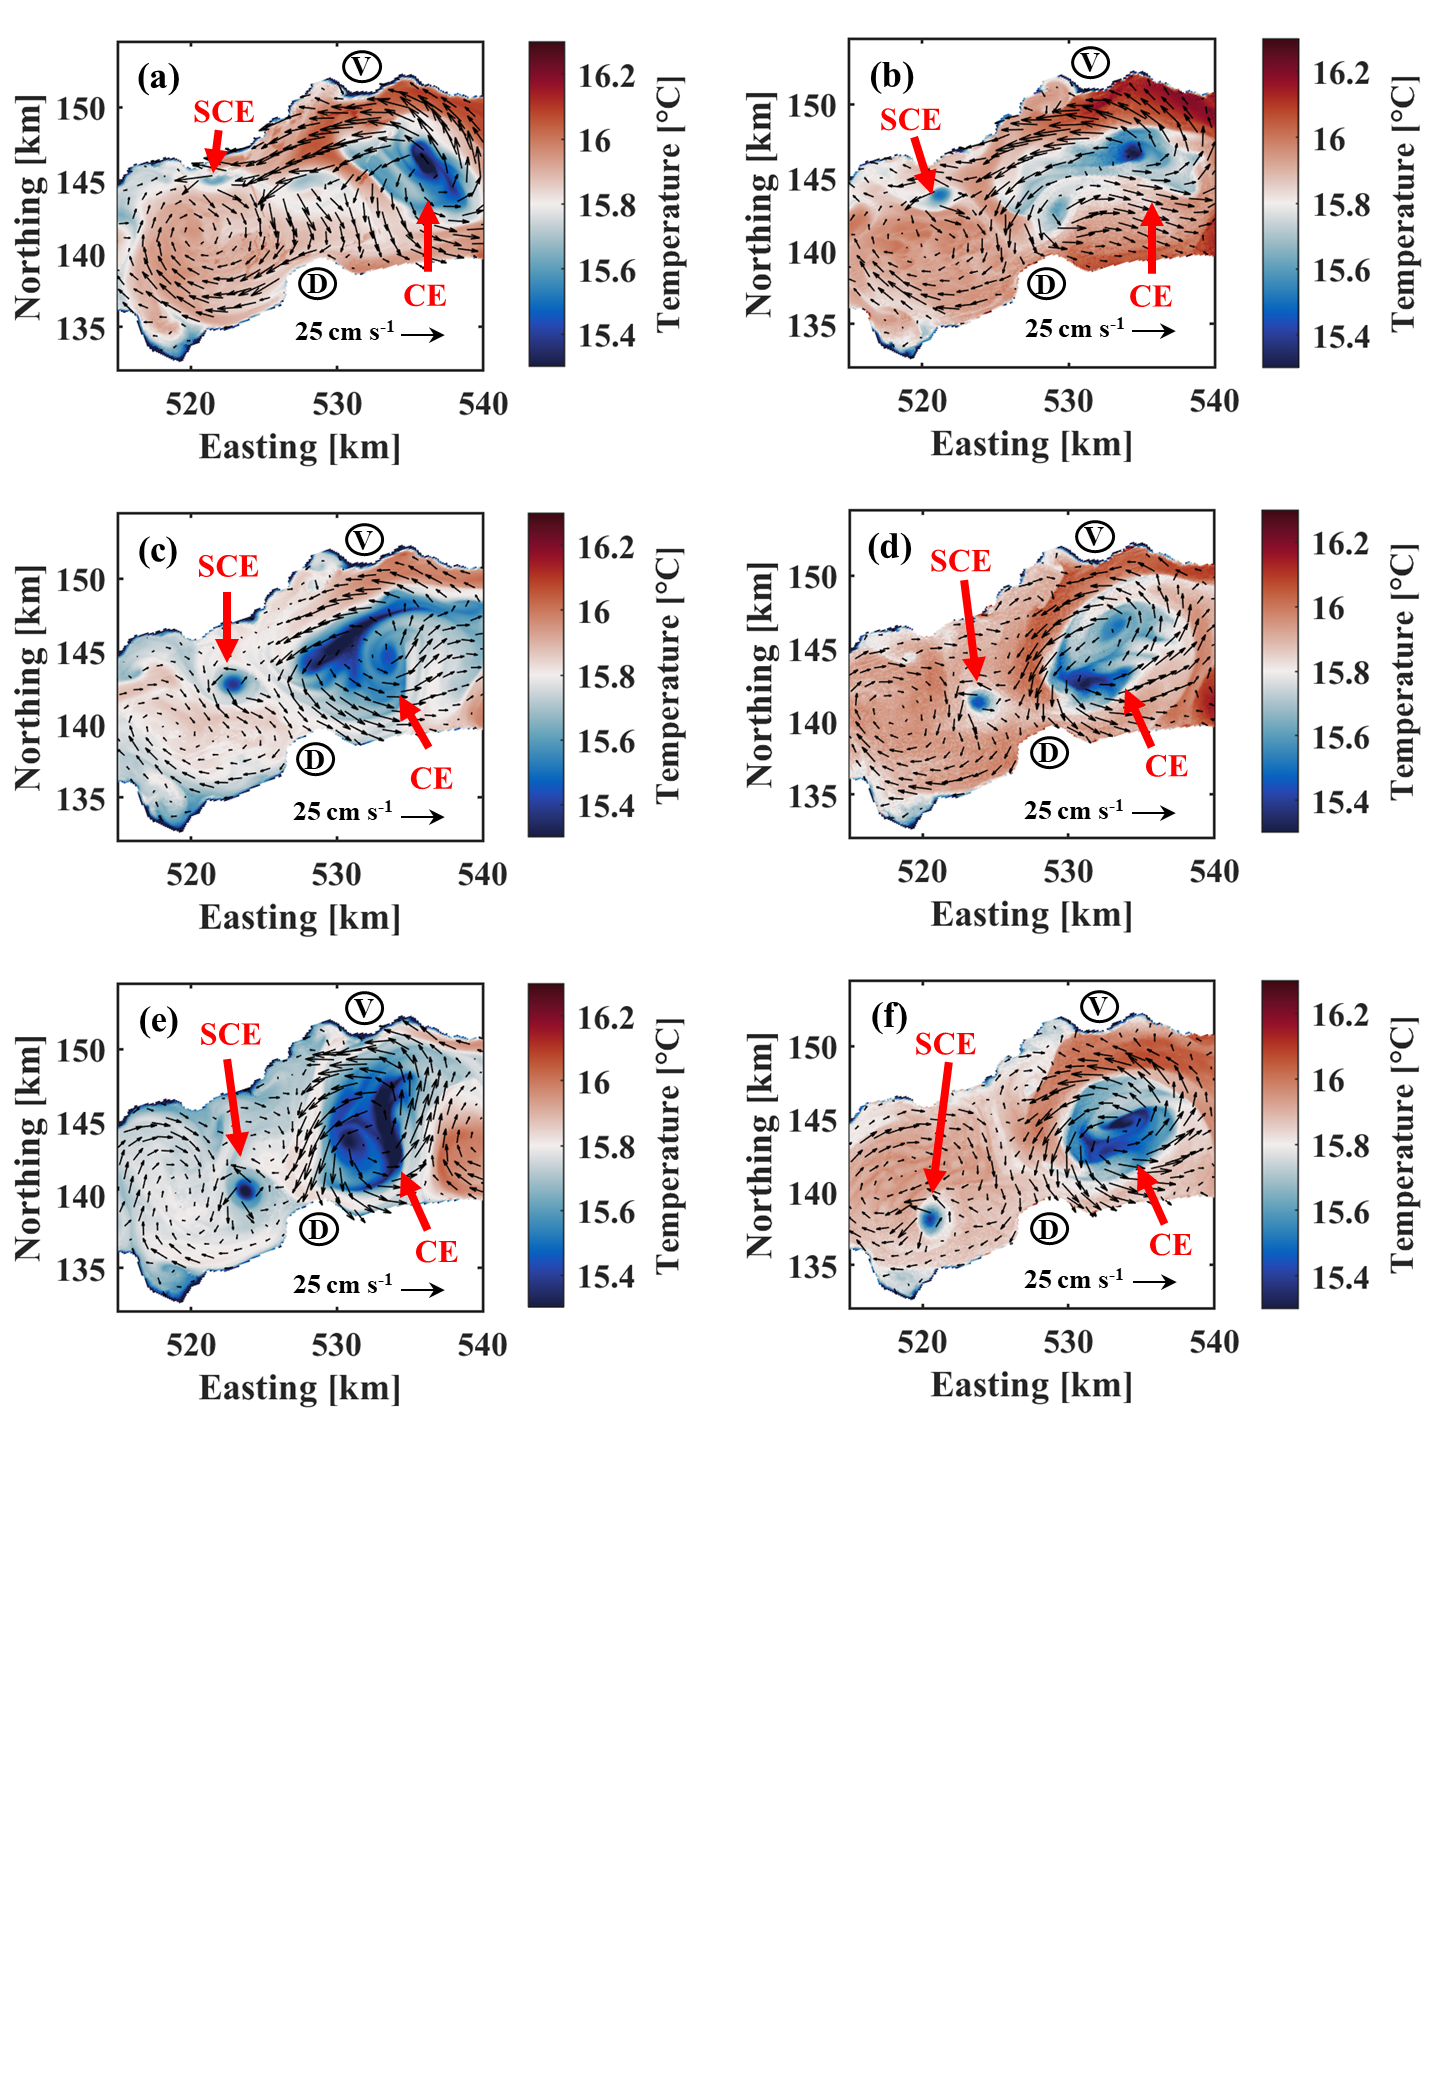


**Fig. S3.** Numerical simulation of the temporal evolution of a Submeoscale Cyclonic Eddy (SCE) and a Cyclonic Eddy (CE) in the *Grand Lac* on October 2021. Near-surface (0.3 m) temperature (colors) and current (black arrows) at: (a) 1:00 CET on 16 October, (b) 13:00 on 16 October, (c) 1:00 on 17 October, (d) 13:00 on 17 October, (e) 1:00 on 18 October and (f) 13:00 on 18 October. Colorbars give the temperature ranges. A reference arrow for the velocity field is indicated in each panel. Note the cold temperatures in the center of CE due to pelagic upwelling and that SCE moves between the two mesoscale eddies.


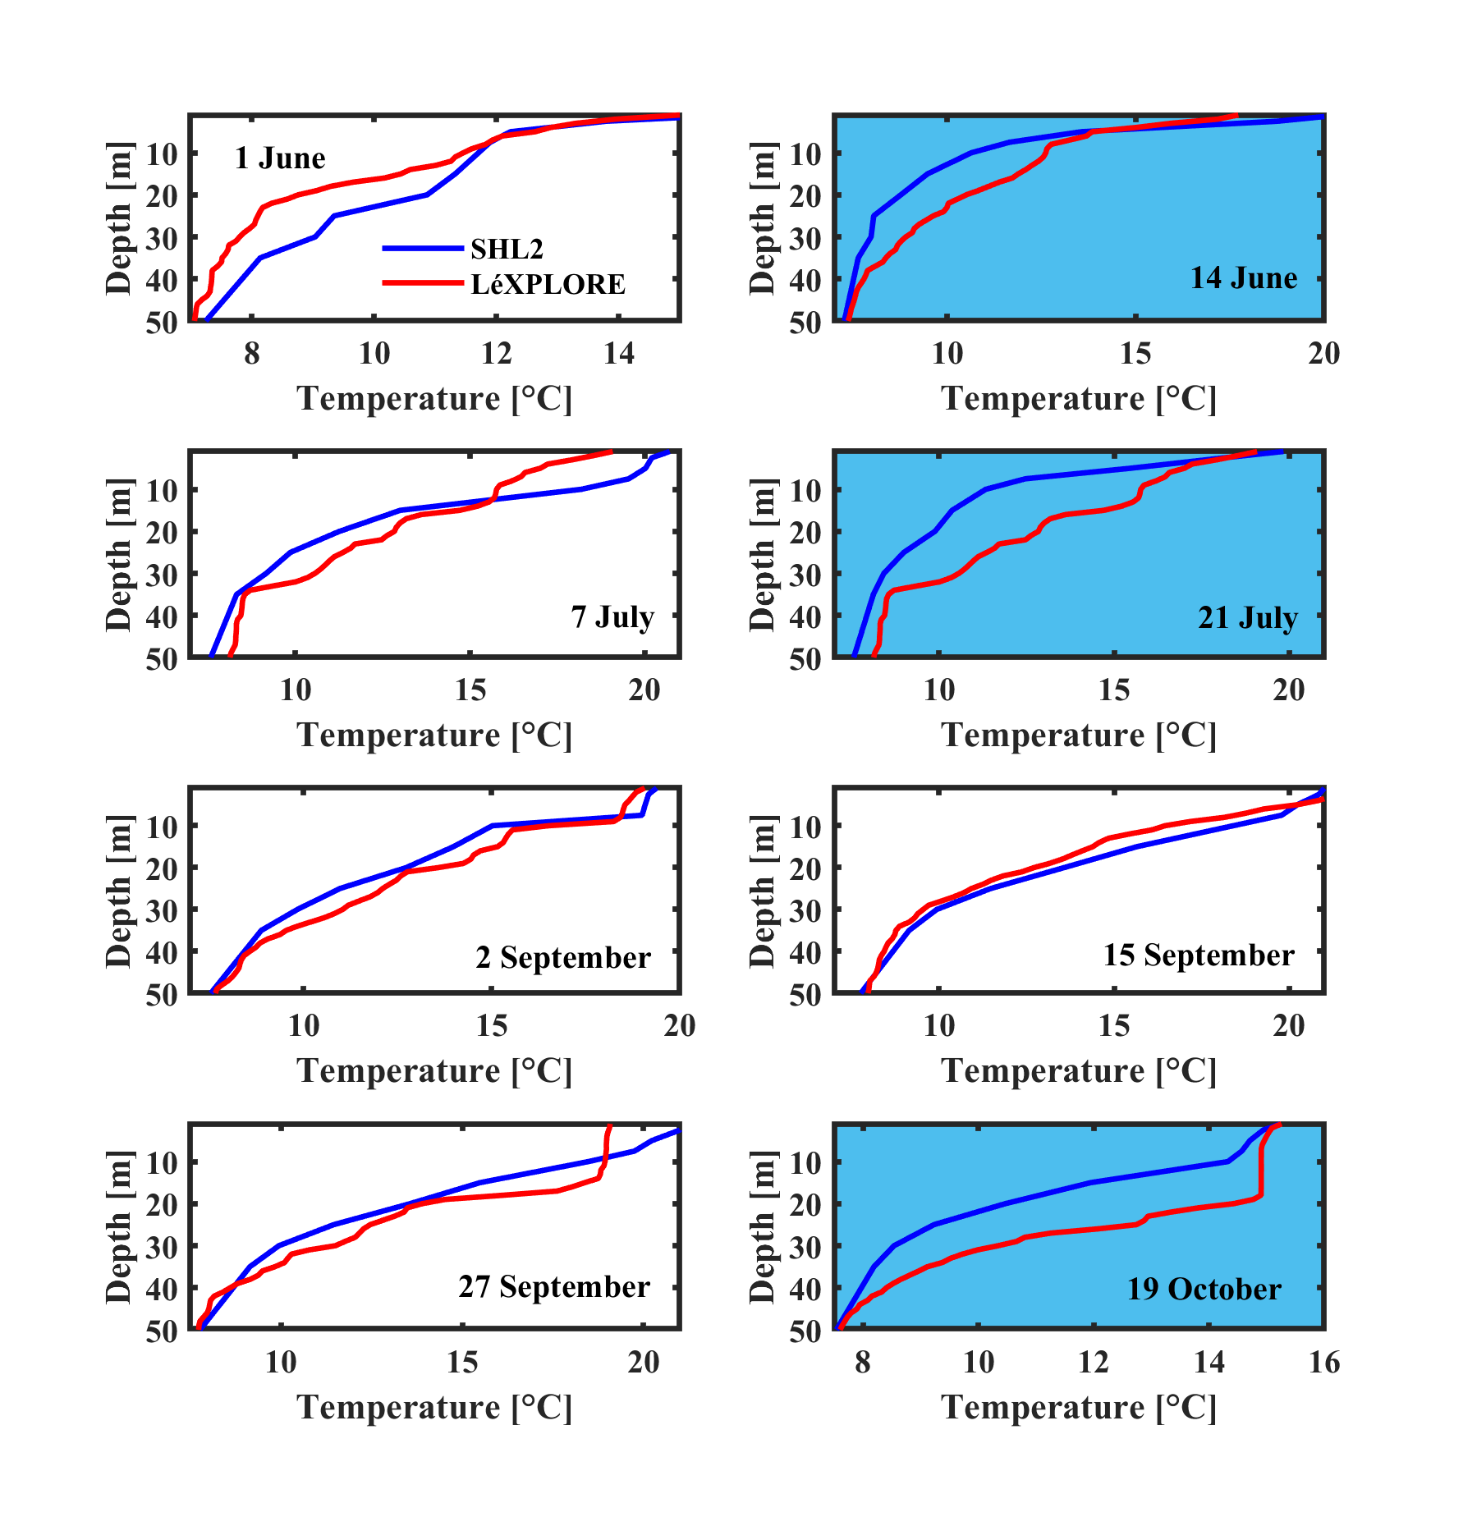


**Fig. S4.** Comparisons of temperature profiles measured at CIPEL station SHL2 (blue lines) and the LéXPLORE platform (red lines) for different months in 2021; for station locations, see Fig. 1a. The blue shaded panels show the cases when significant pelagic upwelling occurred at SHL2 (see Fig. 5d). Only the upper 50-m of the profiles are shown.


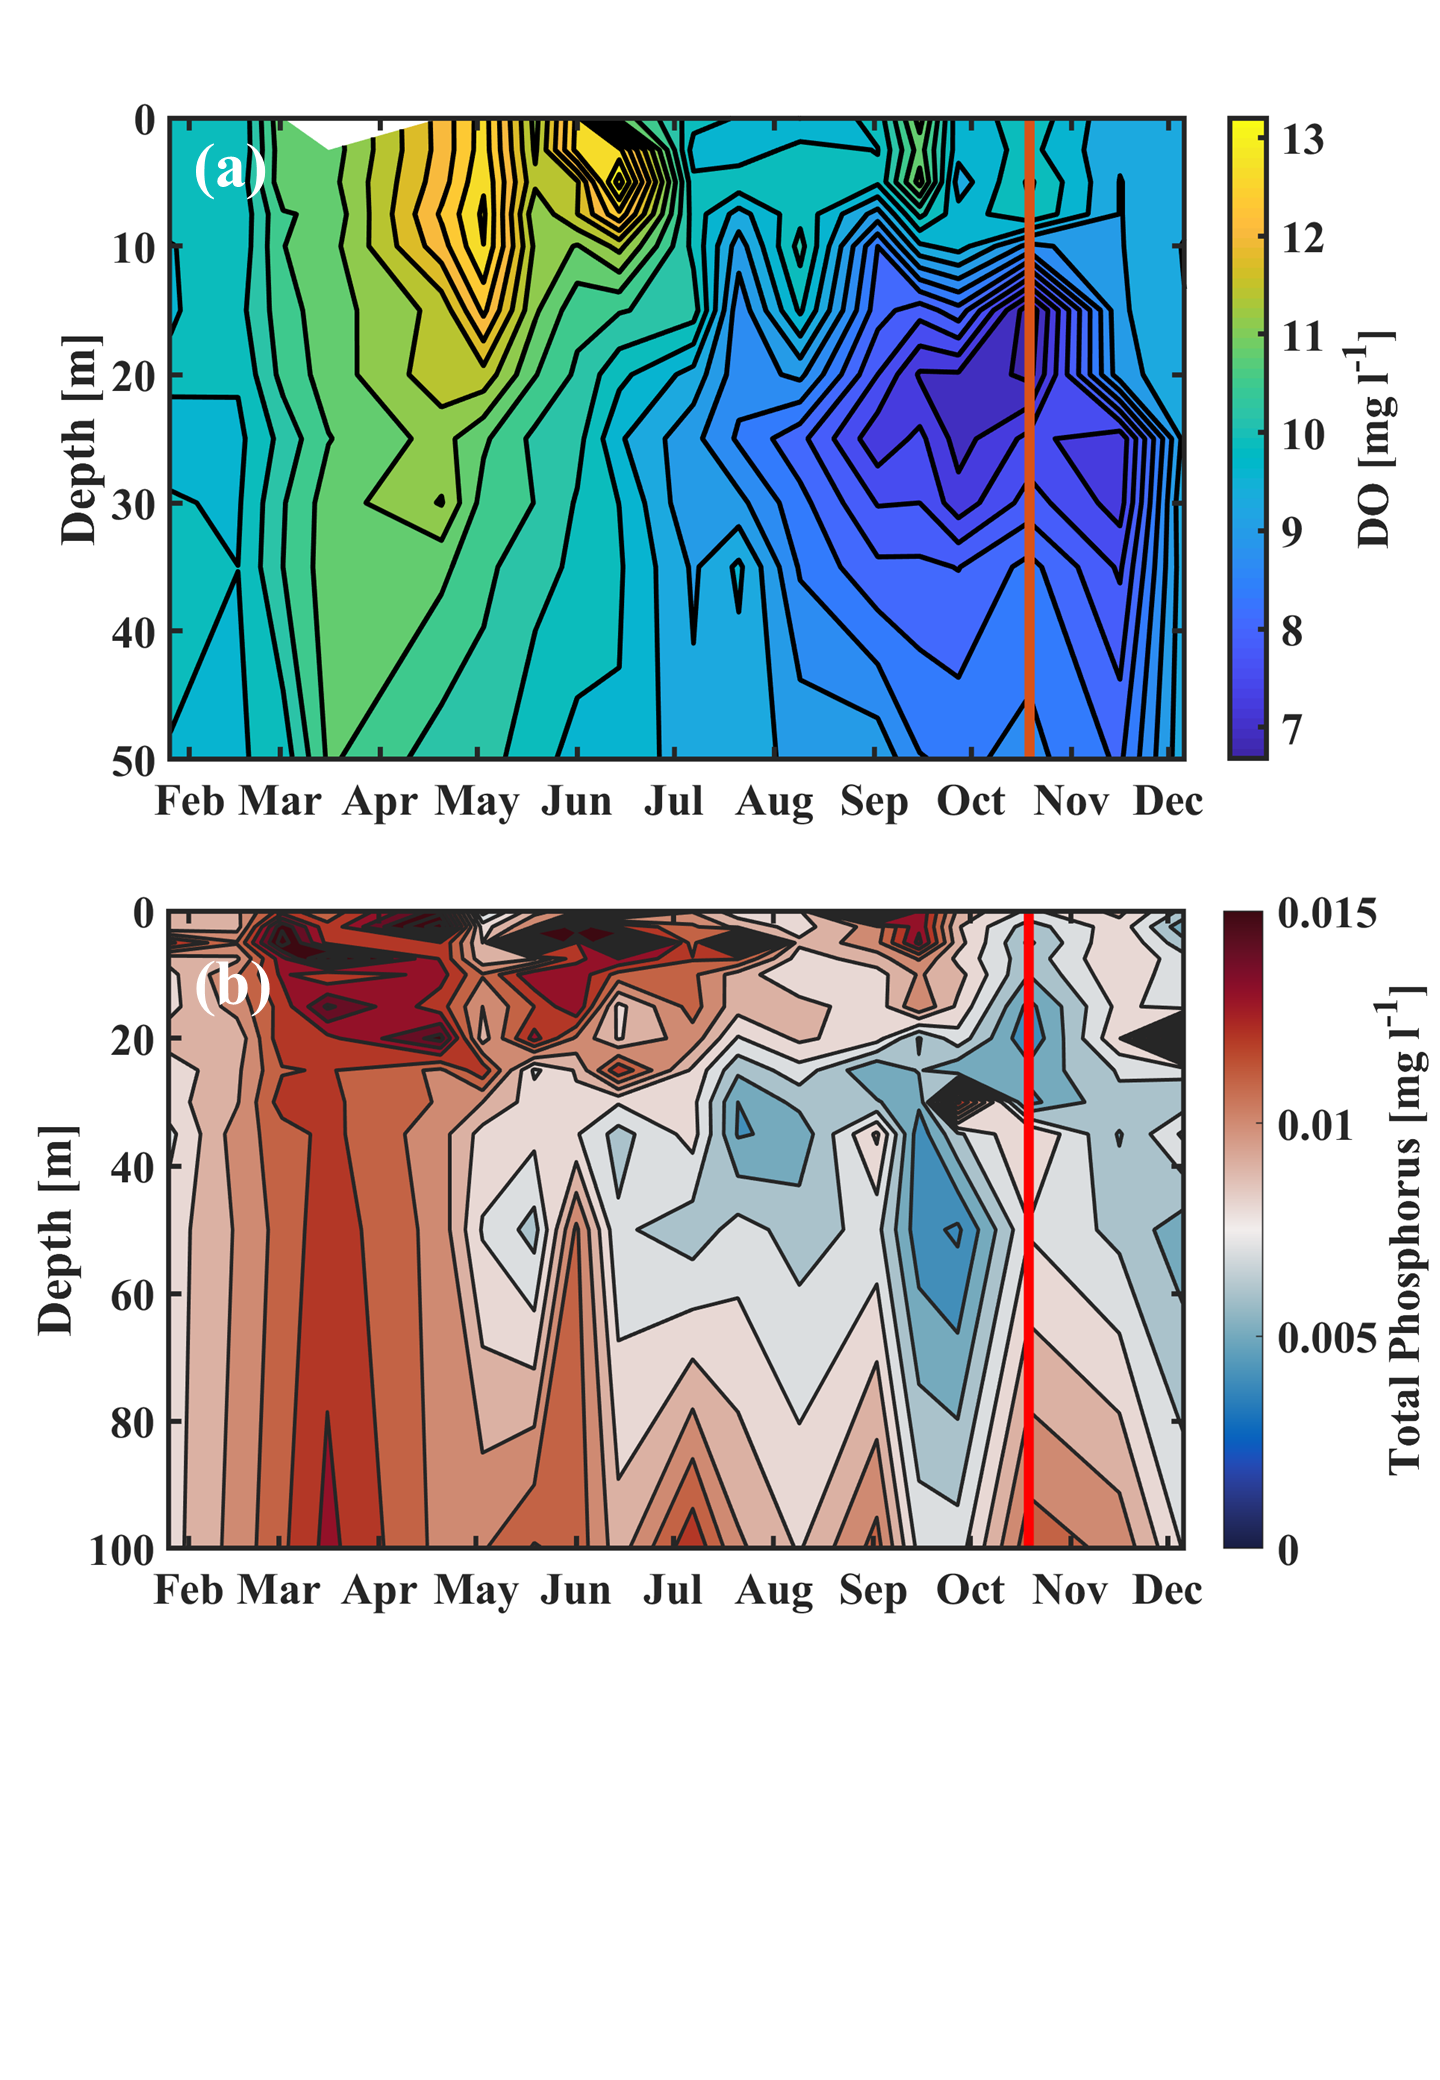


**Fig. S5.** (a) Measured profiles of Dissolved Oxygen (DO) and (b) total phosphorus for 2021 at station SHL2 (data provided by CIPEL). The red vertical lines in (a) and (b) indicate the date when SHL2 and our profiles were measured almost simultaneously on 19 October 2021 shown in Fig. 9 in the main text.
